# Supplementary material for: IER5, a DNA damage response gene, is required for Notch-mediated induction of squamous cell differentiation
Source: eLife. 2020 Sep 16;9:e58081. doi: 10.7554/eLife.58081 (PMC7529455; doi:10.7554/eLife.58081)
Supplement: Supplementary file 6. [file elife-58081-supp6.xlsx]

## Sheet: Sheet1
IC8-gene ID	IC8-gene symbol	MB157-gene ID	MB157-gene symbol	HCC1599-gene id	HCC1599-gene symbol	REC1-gene id	REC1-gene symbol	DND41-gene id	DND41-gene symbol	IC8-MB157 Overlap	IC8-MB157 Overlap	IC8-HCC1599 Overlap	IC8-HCC1599 Overlap	IC8-MB157-HCC1599 Overlap	IC8-REC1 Overlap	IC8-REC1 Overlap	IC8-DND41 Overlap	IC8-DND41 Overlap
ENSG00000197921	HES5	ENSG00000131126	TEX101	ENSG00000110092	CCND1	ENSG00000188290	HES4	ENSG00000225616		ENSG00000069812	HES2	ENSG00000062282	DGAT2	AC006262.1	ENSG00000104140	lincRNA	ENSG00000169994	MYO7B
ENSG00000102837	OLFM4	ENSG00000105383	CD33	ENSG00000268460		ENSG00000260401		ENSG00000117322	CR2	ENSG00000076641	PAG1	ENSG00000076641	PAG1	ANKRD33B	ENSG00000114315	HES1
ENSG00000139508	SLC46A3	ENSG00000248801		ENSG00000172927	MYEOV	ENSG00000175591	P2RY2	ENSG00000073861	TBX21	ENSG00000086570	FAT2	ENSG00000081041	CXCL2	FAT2	ENSG00000135547	HEY2
ENSG00000196557	CACNA1H	ENSG00000255438		ENSG00000164362	TERT	ENSG00000164683	HEY1	ENSG00000206737	RNVU1-18	ENSG00000102755	FLT1	ENSG00000086570	FAT2	HES4	ENSG00000145632	PLK2
ENSG00000204241	AP000911.1	ENSG00000241781		ENSG00000198435	NRARP	ENSG00000114315	HES1	ENSG00000074181	NOTCH3	ENSG00000102804	TSC22D1	ENSG00000089116	LHX5	ID3	ENSG00000163687	DNASE1L3
ENSG00000104140	RHOV	ENSG00000239776		ENSG00000260877		ENSG00000125798	FOXA2	ENSG00000169994	MYO7B	ENSG00000102837	OLFM4	ENSG00000102837	OLFM4	IGFL2-AS1	ENSG00000184371	CSF1
ENSG00000120645	IQSEC3	ENSG00000102837	OLFM4	ENSG00000268621		ENSG00000110900	TSPAN11	ENSG00000151474	FRMD4A	ENSG00000104055	TGM5	ENSG00000102962	CCL22	IL12A	ENSG00000188290	HES4
ENSG00000188293	IGFL1	ENSG00000143603	KCNN3	ENSG00000170425	ADORA2B	ENSG00000163518	FCRL4	ENSG00000200169	RNU5D-1	ENSG00000104140	RHOV	ENSG00000104055	TGM5	MYEOV	ENSG00000198435	NRARP
ENSG00000254968	AP003063.1	ENSG00000259847		ENSG00000169271	HSPB3	ENSG00000074181	NOTCH3	ENSG00000212456	RNVU1-13	ENSG00000104368	PLAT	ENSG00000104140	RHOV	NPBWR1	ENSG00000232810	TNF
ENSG00000167207	NOD2	ENSG00000227591		ENSG00000128342	LIF	ENSG00000117322	CR2	ENSG00000132837	DMGDH	ENSG00000114315	HES1	ENSG00000104368	PLAT	NRARP
ENSG00000130595	TNNT3	ENSG00000232177	MTND4P24	ENSG00000145632	PLK2	ENSG00000136997	MYC	ENSG00000167851	CD300A	ENSG00000116717	GADD45A	ENSG00000117318	ID3	OLFM4
ENSG00000103313	MEFV	ENSG00000104368	PLAT	ENSG00000145194	ECE2	ENSG00000072422	RHOBTB1	ENSG00000253359	IGHV3-37	ENSG00000117318	ID3	ENSG00000137331	IER3	PAG1
ENSG00000111181	SLC6A12	ENSG00000225616		ENSG00000019549	SNAI2	ENSG00000167851	CD300A	ENSG00000272259		ENSG00000128594	LRRC4	ENSG00000142871	CYR61	PLAT
ENSG00000136688	IL36G	ENSG00000207263	SNORD116-16	ENSG00000272512		ENSG00000122367	LDB3	ENSG00000136997	MYC	ENSG00000130595	TNNT3	ENSG00000143333	RGS16	RAB11FIP1
ENSG00000198435	NRARP	ENSG00000134588	USP26	ENSG00000102837	OLFM4	ENSG00000153822	KCNJ16	ENSG00000196329	GIMAP5	ENSG00000135253	KCP	ENSG00000145632	PLK2	RGS16
ENSG00000256540	AC007406.3	ENSG00000261709		ENSG00000169067	ACTBL2	ENSG00000203710	CR1	ENSG00000252835	SCARNA21	ENSG00000135547	HEY2	ENSG00000151014	CCRN4L	RHOV
ENSG00000258086	AC079313.1	ENSG00000134917	ADAMTS8	ENSG00000186603	HPDL	ENSG00000104140	RHOV	ENSG00000180509	KCNE1	ENSG00000138316	ADAMTS14	ENSG00000156113	KCNMA1	TGM5
ENSG00000213626	LBH	ENSG00000205420	KRT6A	ENSG00000260123		ENSG00000260139	CSPG4P13	ENSG00000072163	LIMS2	ENSG00000141579	ZNF750	ENSG00000156675	RAB11FIP1	TMEM171
ENSG00000080573	COL5A3	ENSG00000101384	JAG1	ENSG00000226887	ERVMER34-1	ENSG00000160712	IL6R	ENSG00000171115	GIMAP8	ENSG00000143333	RGS16	ENSG00000157111	TMEM171
ENSG00000164400	CSF2	ENSG00000198435	NRARP	ENSG00000164485	IL22RA2	ENSG00000168350	DEGS2	ENSG00000101230	ISM1	ENSG00000153294	ADGRF4	ENSG00000163661	PTX3
ENSG00000232517	AC112198.2	ENSG00000243592	RPL17P22	ENSG00000181026	AEN	ENSG00000186654	PRR5	ENSG00000163817	SLC6A20	ENSG00000156675	RAB11FIP1	ENSG00000164236	ANKRD33B
ENSG00000151136	BTBD11	ENSG00000254662		ENSG00000148677	ANKRD1	ENSG00000104369	JPH1	ENSG00000253240	IGHV3-36	ENSG00000157111	TMEM171	ENSG00000168811	IL12A
ENSG00000141579	ZNF750	ENSG00000197838	CYP2A13	ENSG00000170324	FRMPD2	ENSG00000198435	NRARP	ENSG00000179598	PLD6	ENSG00000164236	ANKRD33B	ENSG00000169067	ACTBL2
ENSG00000256694	AC026369.2	ENSG00000207375	SNORD116-23	ENSG00000112238	PRDM13	ENSG00000180447	GAS1	ENSG00000253051		ENSG00000168811	IL12A	ENSG00000169429	IL8
ENSG00000232810	TNF	ENSG00000271857		ENSG00000226791		ENSG00000233922		ENSG00000125089	SH3TC1	ENSG00000169594	BNC1	ENSG00000169884	WNT10B
ENSG00000113578	FGF1	ENSG00000252326	SNORD116-25	ENSG00000186297	GABRA5	ENSG00000216863	LY86-AS1	ENSG00000135144	DTX1	ENSG00000170454	KRT75	ENSG00000170477	KRT4
ENSG00000269959	SPACA6P-AS	ENSG00000270792		ENSG00000168811	IL12A	ENSG00000163686	ABHD6	ENSG00000211956	IGHV4-34	ENSG00000172927	MYEOV	ENSG00000172216	CEBPB
ENSG00000197241	SLC2A7	ENSG00000238531	SNORD105B	ENSG00000168389	MFSD2A	ENSG00000099937	SERPIND1	ENSG00000249784	SCARNA22	ENSG00000176641	RNF152	ENSG00000172927	MYEOV
ENSG00000188488	SERPINA5	ENSG00000207093	SNORD116-8	ENSG00000269745		ENSG00000104951	IL4I1	ENSG00000048162	NOP16	ENSG00000183729	NPBWR1	ENSG00000183421	RIPK4
ENSG00000011083	SLC6A7	ENSG00000272841		ENSG00000174473	GALNTL6	ENSG00000145990	GFOD1	ENSG00000177954	RPS27	ENSG00000185479	KRT6B	ENSG00000183729	NPBWR1
ENSG00000169429	CXCL8	ENSG00000249784	SCARNA22	ENSG00000005513	SOX8	ENSG00000163687	DNASE1L3	ENSG00000238961	SNORA47	ENSG00000188290	HES4	ENSG00000188290	HES4
ENSG00000062282	DGAT2	ENSG00000226577	MICC	ENSG00000136997	MYC	ENSG00000225968	ELFN1	ENSG00000179144	GIMAP7	ENSG00000188293	IGFL1	ENSG00000188883	KLRG2
ENSG00000009790	TRAF3IP3	ENSG00000206989	SNORD63	ENSG00000188290	HES4	ENSG00000134569	LRP4	ENSG00000200794	RN7SKP250	ENSG00000198435	NRARP	ENSG00000196136	SERPINA3
ENSG00000167768	KRT1	ENSG00000144152	FBLN7	ENSG00000118523	CTGF	ENSG00000179431	FJX1	ENSG00000160683	CXCR5	ENSG00000248489	LINC02062	ENSG00000198435	NRARP
ENSG00000101096	NFATC2	ENSG00000180509	KCNE1	ENSG00000069482	GAL	ENSG00000165238	WNK2	ENSG00000196866	HIST1H2AD	ENSG00000256304	CCDC150P1	ENSG00000213626	LBH
ENSG00000166592	RRAD	ENSG00000182463	TSHZ2	ENSG00000239677	PDZRN3-AS1	ENSG00000178162	FAR2P2	ENSG00000186654	PRR5	ENSG00000263235	sense_overlapping transcript	ENSG00000260877	AP005233.2
ENSG00000229035	SPRR2C	ENSG00000235902		ENSG00000272189		ENSG00000245526	LINC00461	ENSG00000270072		ENSG00000268201	AC020915.3	ENSG00000263235	sense_overlapping
ENSG00000260996	BX255925.1	ENSG00000047662	FAM184B	ENSG00000175591	P2RY2	ENSG00000139352	ASCL1	ENSG00000212283	SNORD89	ENSG00000268460	AC006262.1	ENSG00000268460	AC006262.1
ENSG00000066405	CLDN18	ENSG00000127152	BCL11B	ENSG00000221771	MIR1205	ENSG00000176749	CDK5R1	ENSG00000125533	BHLHE23	ENSG00000268621	IGFL2-AS1	ENSG00000268621	IGFL2-AS1
ENSG00000144868	TMEM108	ENSG00000199065	MIR101-2	ENSG00000081041	CXCL2	ENSG00000135547	HEY2	ENSG00000111644	ACRBP	ENSG00000272449	AL139246.5	ENSG00000272512	AL645608.8
ENSG00000272512	AL645608.8	ENSG00000232393	RPL5P6	ENSG00000151014	CCRN4L	ENSG00000178562	CD28	ENSG00000117877	CD3EAP	ENSG00000272512	LincRNA
ENSG00000100628	ASB2	ENSG00000232434	C9orf172	ENSG00000007968	E2F2	ENSG00000099814	CEP170B	ENSG00000152207	CYSLTR2	ENSG00000272841	AL139393.2
ENSG00000104055	TGM5	ENSG00000258378		ENSG00000166391	MOGAT2	ENSG00000099282	TSPAN15	ENSG00000163818	LZTFL1
ENSG00000163687	DNASE1L3	ENSG00000234857	HNRNPUL2-BSCL2	ENSG00000083454	P2RX5	ENSG00000168878	SFTPB	ENSG00000168653	NDUFS5
ENSG00000127472	PLA2G5	ENSG00000253190		ENSG00000198393	ZNF26	ENSG00000268040		ENSG00000267127
ENSG00000186442	KRT3	ENSG00000260035		ENSG00000246334	PRR7-AS1	ENSG00000159399	HK2	ENSG00000260727	SLC7A5P1
ENSG00000101443	WFDC2	ENSG00000019549	SNAI2	ENSG00000260401		ENSG00000111729	CLEC4A	ENSG00000229222	KRT18P4
ENSG00000188257	PLA2G2A	ENSG00000116717	GADD45A	ENSG00000137440	FGFBP1	ENSG00000127507	EMR2	ENSG00000220305	HNRNPH1P1
ENSG00000102755	FLT1	ENSG00000207063	SNORD116-1	ENSG00000155380	SLC16A1	ENSG00000228314	CYP4F29P	ENSG00000234816
ENSG00000163218	PGLYRP4	ENSG00000268120		ENSG00000143333	RGS16	ENSG00000261786		ENSG00000199165	MIRLET7A1
ENSG00000254605	AP003555.2	ENSG00000214108	TPT1P5	ENSG00000159399	HK2	ENSG00000165675	ENOX2	ENSG00000250400	LINC00977
ENSG00000134259	NGF	ENSG00000166106	ADAMTS15	ENSG00000259343		ENSG00000126368	NR1D1	ENSG00000124614	RPS10
ENSG00000069812	HES2	ENSG00000254537		ENSG00000184937	WT1	ENSG00000010810	FYN	ENSG00000271590
ENSG00000158163	DZIP1L	ENSG00000232445		ENSG00000170477	KRT4	ENSG00000215417	MIR17HG	ENSG00000235613	NSRP1P1
ENSG00000169554	ZEB2	ENSG00000265470	MIR548AQ	ENSG00000134470	IL15RA	ENSG00000170054	SERPINA9	ENSG00000189046	ALKBH2
ENSG00000143195	ILDR2	ENSG00000022355	GABRA1	ENSG00000106852	LHX6	ENSG00000184489	PTP4A3	ENSG00000175264	CHST1
ENSG00000169474	SPRR1A	ENSG00000225091	SNORA71A	ENSG00000147119	CHST7	ENSG00000164484	TMEM200A	ENSG00000235688
ENSG00000128510	CPA4	ENSG00000206630	SNORD60	ENSG00000196136	SERPINA3	ENSG00000138623	SEMA7A	ENSG00000213828
ENSG00000222112	RN7SKP16	ENSG00000201512	SNORA71C	ENSG00000171617	ENC1	ENSG00000125430	HS3ST3B1	ENSG00000166289	PLEKHF1
ENSG00000140519	RHCG	ENSG00000178235	SLITRK1	ENSG00000081985	IL12RB2	ENSG00000132622	HSPA12B	ENSG00000264268	MIR4767
ENSG00000267922	AC007785.1	ENSG00000113532	ST8SIA4	ENSG00000099625	C19orf26	ENSG00000048162	NOP16	ENSG00000268555
ENSG00000143217	NECTIN4	ENSG00000132837	DMGDH	ENSG00000187678	SPRY4	ENSG00000174938	SEZ6L2	ENSG00000251806	SNORD119
ENSG00000183876	ARSI	ENSG00000257956		ENSG00000180447	GAS1	ENSG00000078081	LAMP3	ENSG00000267523
ENSG00000179546	HTR1D	ENSG00000170465	KRT6C	ENSG00000268262		ENSG00000157483	MYO1E	ENSG00000231125
ENSG00000175003	SLC22A1	ENSG00000225338		ENSG00000153976	HS3ST3A1	ENSG00000004660	CAMKK1	ENSG00000208892	SNORA49
ENSG00000244376	RN7SL636P	ENSG00000252835	SCARNA21	ENSG00000240280	TCAM1P	ENSG00000164574	GALNT10	ENSG00000254676
ENSG00000272449	AL139246.5	ENSG00000169059	VCX3A	ENSG00000163376	KBTBD8	ENSG00000182240	BACE2	ENSG00000245888
ENSG00000182261	NLRP10	ENSG00000100285	NEFH	ENSG00000163491	NEK10	ENSG00000260727	SLC7A5P1	ENSG00000266037	RN7SL3
ENSG00000229021	AL450992.1	ENSG00000145824	CXCL14	ENSG00000246582		ENSG00000020633	RUNX3	ENSG00000260763
ENSG00000256050	AL583722.1	ENSG00000201098	RNY1	ENSG00000249688		ENSG00000173638	SLC19A1	ENSG00000199347	RNU5E-1
ENSG00000124102	PI3	ENSG00000158050	DUSP2	ENSG00000120088	CRHR1	ENSG00000161940	BCL6B	ENSG00000256813
ENSG00000262877	AC110285.2	ENSG00000238961	SNORA47	ENSG00000020181	GPR124	ENSG00000146072	TNFRSF21	ENSG00000273338
ENSG00000265799	AC090844.3	ENSG00000216195	MIR941-3	ENSG00000165449	SLC16A9	ENSG00000173868	PHOSPHO1	ENSG00000198987	MIR16-2
ENSG00000159388	BTG2	ENSG00000271590		ENSG00000259279		ENSG00000109452	INPP4B	ENSG00000252213
ENSG00000196196	HRCT1	ENSG00000259932		ENSG00000254027		ENSG00000227309		ENSG00000226806
ENSG00000237732	AC010980.1	ENSG00000136997	MYC	ENSG00000147509	RGS20	ENSG00000227217		ENSG00000211957	IGHV3-35
ENSG00000170454	KRT75	ENSG00000233514		ENSG00000077522	ACTN2	ENSG00000160999	SH2B2	ENSG00000269688
ENSG00000188290	HES4	ENSG00000127922	SHFM1	ENSG00000163735	CXCL5	ENSG00000027697	IFNGR1	ENSG00000148935	GAS2
ENSG00000159713	TPPP3	ENSG00000212452	SNORD69	ENSG00000163734	CXCL3	ENSG00000183570	PCBP3	ENSG00000272092
ENSG00000005001	PRSS22	ENSG00000200156	RNU5B-1	ENSG00000118971	CCND2	ENSG00000124216	SNAI1	ENSG00000212534	SNORD70
ENSG00000225963	AC009950.1	ENSG00000185668	POU3F1	ENSG00000163032	VSNL1	ENSG00000125968	ID1	ENSG00000201801	RNU5E-4P
ENSG00000249241	LINC02265	ENSG00000269396		ENSG00000156675	RAB11FIP1	ENSG00000206754	SNORD101	ENSG00000270022	RNU12
ENSG00000175170	FAM182B	ENSG00000260316		ENSG00000228612	HK2P1	ENSG00000136002	ARHGEF4	ENSG00000233762
ENSG00000101680	LAMA1	ENSG00000125816	NKX2-4	ENSG00000178821	TMEM52	ENSG00000241609	NA	ENSG00000259494	MRPL46
ENSG00000164236	ANKRD33B	ENSG00000138316	ADAMTS14	ENSG00000243914	RPL5P14	ENSG00000266651		ENSG00000241343	RPL36A
ENSG00000041515	MYO16	ENSG00000114315	HES1	ENSG00000183023	SLC8A1	ENSG00000170500	LONRF2	ENSG00000200867	RN7SKP36
ENSG00000260877	AP005233.2	ENSG00000212534	SNORD70	ENSG00000131188	PRR7	ENSG00000189337	KAZN	ENSG00000125968	ID1
ENSG00000224992	AL445645.1	ENSG00000133401	PDZD2	ENSG00000180044	C3orf80	ENSG00000266709		ENSG00000260452	TPRKBP2
ENSG00000206077	ZDHHC11B	ENSG00000104722	NEFM	ENSG00000112769	LAMA4	ENSG00000168685	IL7R	ENSG00000243005	RN7SL16P
ENSG00000268879	IGFL1P1	ENSG00000255008		ENSG00000234788	HSPA8P3	ENSG00000105612	DNASE2	ENSG00000260236
ENSG00000266074	BAHCC1	ENSG00000200354	SNORA71D	ENSG00000268601		ENSG00000187210	GCNT1	ENSG00000127184	COX7C
ENSG00000266392	MIR4740	ENSG00000243680	RPL37P23	ENSG00000181649	PHLDA2	ENSG00000243678	NME1-NME2	ENSG00000113721	PDGFRB
ENSG00000268460	AC006262.1	ENSG00000251806	SNORD119	ENSG00000100433	KCNK10	ENSG00000145287	PLAC8	ENSG00000234043
ENSG00000213071	LPAL2	ENSG00000180616	SSTR2	ENSG00000137801	THBS1	ENSG00000135835	KIAA1614	ENSG00000179041	RRS1
ENSG00000207730	MIR200B	ENSG00000130066	SAT1	ENSG00000179431	FJX1	ENSG00000175048	ZDHHC14	ENSG00000200243	RN7SKP79
ENSG00000203783	PRR9	ENSG00000169594	BNC1	ENSG00000224837	GCSHP5	ENSG00000111859	NEDD9	ENSG00000224635
ENSG00000131459	GFPT2	ENSG00000148677	ANKRD1	ENSG00000198108	CHSY3	ENSG00000233766		ENSG00000213203	GIMAP1
ENSG00000130600	H19	ENSG00000070886	EPHA8	ENSG00000117525	F3	ENSG00000262155		ENSG00000261404
ENSG00000136244	IL6	ENSG00000207088	SNORA7B	ENSG00000247626	MARS2	ENSG00000040933	INPP4A	ENSG00000226763	SRRM5
ENSG00000130487	KLHDC7B	ENSG00000184110	EIF3C	ENSG00000260727	SLC7A5P1	ENSG00000221500	SNORD100	ENSG00000122223	CD244
ENSG00000187372	PCDHB13	ENSG00000207245	SNORD116-29	ENSG00000237697	LINC00312	ENSG00000111962	UST	ENSG00000260369
ENSG00000132563	REEP2	ENSG00000207344		ENSG00000272711		ENSG00000198298	ZNF485	ENSG00000160818	GPATCH4
ENSG00000185479	KRT6B	ENSG00000267322		ENSG00000165092	ALDH1A1	ENSG00000160856	FCRL3	ENSG00000186603	HPDL
ENSG00000135253	KCP	ENSG00000196562	SULF2	ENSG00000207870	MIR221	ENSG00000157303	SUSD3	ENSG00000196683	TOMM7
ENSG00000185215	TNFAIP2	ENSG00000181449	SOX2	ENSG00000113356	POLR3G	ENSG00000181026	AEN	ENSG00000247627	MTND4P12
ENSG00000186832	KRT16	ENSG00000209702	SNORD41	ENSG00000212607	SNORA45	ENSG00000143179	UCK2	ENSG00000183199	HSP90AB3P
ENSG00000246250	AC087521.2	ENSG00000272034	SNORD14A	ENSG00000214108	TPT1P5	ENSG00000153721	CNKSR3	ENSG00000161835	GRASP
ENSG00000146477	SLC22A3	ENSG00000143340	FAM163A	ENSG00000112394	SLC16A10	ENSG00000145632	PLK2	ENSG00000230629	RPS23P8
ENSG00000261187	AC079322.1	ENSG00000268191		ENSG00000189410	SH2D5	ENSG00000089558	KCNH4	ENSG00000247033
ENSG00000232671	AL391069.2	ENSG00000263603		ENSG00000272016		ENSG00000112759	SLC29A1	ENSG00000037897	METTL1
ENSG00000100033	PRODH	ENSG00000207001	SNORD116-2	ENSG00000146674	IGFBP3	ENSG00000241484	ARHGAP8	ENSG00000263826
ENSG00000248712	CCDC153	ENSG00000257663		ENSG00000174469	CNTNAP2	ENSG00000165272	AQP3	ENSG00000272711
ENSG00000283031	AC009242.1	ENSG00000116132	PRRX1	ENSG00000249896		ENSG00000232810	TNF	ENSG00000119599	DCAF4
ENSG00000228492	RAB11FIP1P1	ENSG00000266969		ENSG00000164211	STARD4	ENSG00000154127	UBASH3B	ENSG00000159399	HK2
ENSG00000117318	ID3	ENSG00000112541	PDE10A	ENSG00000092607	TBX15	ENSG00000188822	CNR2	ENSG00000160207	HSF2BP
ENSG00000196136	SERPINA3	ENSG00000172927	MYEOV	ENSG00000232445		ENSG00000112195	TREML2	ENSG00000229623	METTL21AP1
ENSG00000125398	SOX9	ENSG00000221539	SNORD99	ENSG00000248624		ENSG00000184371	CSF1	ENSG00000109771	LRP2BP
ENSG00000182352	C17orf77	ENSG00000207137	SNORD116-13	ENSG00000233077		ENSG00000108175	ZMIZ1	ENSG00000202360	RN7SKP249
ENSG00000182492	BGN	ENSG00000222611		ENSG00000225357	RPF2P1	ENSG00000145220	LYAR	ENSG00000254911	SCARNA9
ENSG00000163661	PTX3	ENSG00000199753	SNORD104	ENSG00000189007	ADAT2	ENSG00000148840	PPRC1	ENSG00000116649	SRM
ENSG00000197249	SERPINA1	ENSG00000168653	NDUFS5	ENSG00000125454	SLC25A19	ENSG00000107815	C10orf2	ENSG00000196352	CD55
ENSG00000248360	LINC00504	ENSG00000205642	VCX3B	ENSG00000065989	PDE4A	ENSG00000111863	ADTRP	ENSG00000254093	PINX1
ENSG00000105808	RASA4	ENSG00000243914	RPL5P14	ENSG00000128059	PPAT	ENSG00000179627	ZBTB42	ENSG00000173457	PPP1R14B
ENSG00000125735	TNFSF14	ENSG00000143333	RGS16	ENSG00000089558	KCNH4	ENSG00000095397	DFNB31	ENSG00000087269	NOP14
ENSG00000163739	CXCL1	ENSG00000252139		ENSG00000214999				ENSG00000110104	CCDC86
ENSG00000232729	AC211433.1	ENSG00000160818	GPATCH4	ENSG00000152455	SUV39H2			ENSG00000260645
ENSG00000184330	S100A7A	ENSG00000102755	FLT1	ENSG00000214289	RPL39P5			ENSG00000229388
ENSG00000163874	ZC3H12A	ENSG00000272711		ENSG00000148840	PPRC1			ENSG00000254860	TMEM9B-AS1
ENSG00000114315	HES1	ENSG00000164683	HEY1	ENSG00000201581	RN7SKP78			ENSG00000249119	MTND6P4
ENSG00000228407	AL139156.2	ENSG00000147996	CBWD5	ENSG00000137331	IER3			ENSG00000180822	PSMG4
ENSG00000122861	PLAU	ENSG00000117318	ID3	ENSG00000263235				ENSG00000218426
ENSG00000186831	KRT17P2	ENSG00000128714	HOXD13	ENSG00000086570	FAT2			ENSG00000147174	ACRC
ENSG00000228261	AL162742.1	ENSG00000167311	ART5	ENSG00000135763	URB2			ENSG00000253440	IGHV3-33-2
ENSG00000231870	KRT17P3	ENSG00000154479	CCDC173	ENSG00000179348	GATA2			ENSG00000256712
ENSG00000183421	RIPK4	ENSG00000260248		ENSG00000253368	TRNP1			ENSG00000166441	RPL27A
ENSG00000125538	IL1B	ENSG00000177954	RPS27	ENSG00000166166	TRMT61A			ENSG00000101084	C20orf24
ENSG00000162757	C1orf74	ENSG00000235408	SNORA71B	ENSG00000211454	AKR7L			ENSG00000105258	POLR2I
ENSG00000183034	OTOP2	ENSG00000262902		ENSG00000113389	NPR3			ENSG00000236017	ASMTL-AS1
ENSG00000267034	AC010980.2	ENSG00000250762		ENSG00000225213				ENSG00000239039	SNORD13
ENSG00000260448	LCMT1-AS1	ENSG00000269867		ENSG00000169884	WNT10B
ENSG00000263335	AF001548.2	ENSG00000104140	RHOV	ENSG00000241360	PDXP
ENSG00000183628	DGCR6	ENSG00000113356	POLR3G	ENSG00000198576	ARC
ENSG00000227512	AL592301.1	ENSG00000236066		ENSG00000104689	TNFRSF10A
ENSG00000250509	AC034213.1	ENSG00000227220		ENSG00000134533	RERG
ENSG00000176641	RNF152	ENSG00000112769	LAMA4	ENSG00000234160
ENSG00000230836	LINC01293	ENSG00000164076	CAMKV	ENSG00000075213	SEMA3A
ENSG00000169994	MYO7B	ENSG00000264268	MIR4767	ENSG00000137841	PLCB2
ENSG00000116039	ATP6V1B1	ENSG00000212283	SNORD89	ENSG00000178409	BEND3
ENSG00000205177	C11orf91	ENSG00000212493	SNORD19	ENSG00000104055	TGM5
ENSG00000129990	SYT5	ENSG00000152270	PDE3B	ENSG00000123505	AMD1
ENSG00000176092	CRYBG2	ENSG00000227782		ENSG00000112541	PDE10A
ENSG00000169242	EFNA1	ENSG00000228302		ENSG00000188042	ARL4C
ENSG00000101278	RPS10P5	ENSG00000199568	RNU5A-1	ENSG00000261373	VPS9D1-AS1
ENSG00000143469	SYT14	ENSG00000169271	HSPB3	ENSG00000065183	WDR3
ENSG00000235897	TM4SF19-AS1	ENSG00000164687	FABP5	ENSG00000164086	DUSP7
ENSG00000166949	SMAD3	ENSG00000117322	CR2	ENSG00000146205	ANO7
ENSG00000266648	SETP3	ENSG00000233785		ENSG00000207067	SNORA72
ENSG00000158055	GRHL3	ENSG00000200785	SNORD8	ENSG00000101311	FERMT1
ENSG00000265752	AC010754.1	ENSG00000260206		ENSG00000101224	CDC25B
ENSG00000172927	MYEOV	ENSG00000264939		ENSG00000259330	LINC00984
ENSG00000255202	AL049629.1	ENSG00000199237	RNU6-834P	ENSG00000237187	NR2F1-AS1
ENSG00000181143	MUC16	ENSG00000257000		ENSG00000125630	POLR1B
ENSG00000115009	CCL20	ENSG00000163032	VSNL1	ENSG00000128805	ARHGAP22
ENSG00000284738	AL358472.5	ENSG00000199420	RN7SKP170	ENSG00000188158	NHS
ENSG00000279982	AL162274.3	ENSG00000207031	SNORD59A	ENSG00000144354	CDCA7
ENSG00000273784	AL137058.2	ENSG00000126653	NSRP1	ENSG00000182752	PAPPA
ENSG00000279873	LINC01126	ENSG00000178440	LINC00843	ENSG00000145220	LYAR
ENSG00000143867	OSR1	ENSG00000201699	RNU1-59P	ENSG00000270069
ENSG00000156113	KCNMA1	ENSG00000270711		ENSG00000128045	RASL11B
ENSG00000248641	HMGA1P2	ENSG00000239039	SNORD13	ENSG00000179041	RRS1
ENSG00000166670	MMP10	ENSG00000207442	SNORD116-6	ENSG00000006210	CX3CL1
ENSG00000100985	MMP9	ENSG00000110092	CCND1	ENSG00000143382	ADAMTSL4
ENSG00000116717	GADD45A	ENSG00000072041	SLC6A15	ENSG00000273366
ENSG00000236384	LINC00479	ENSG00000257453		ENSG00000089116	LHX5
ENSG00000242267	SKINT1L	ENSG00000141579	ZNF750	ENSG00000185697	MYBL1
ENSG00000276980	AC008760.2	ENSG00000234741	GAS5	ENSG00000260711
ENSG00000163207	IVL	ENSG00000165449	SLC16A9	ENSG00000182632	CCNYL2
ENSG00000133101	CCNA1	ENSG00000162728	KCNJ9	ENSG00000143384	MCL1
ENSG00000141497	ZMYND15	ENSG00000255717	SNHG1	ENSG00000226520	KIRREL-IT1
ENSG00000170477	KRT4	ENSG00000227081		ENSG00000235436	DPY19L2P4
ENSG00000134339	SAA2	ENSG00000248624		ENSG00000166450	PRTG
ENSG00000132854	KANK4	ENSG00000249565	SERBP1P5	ENSG00000209482	SNORD83A
ENSG00000270001	AL121894.2	ENSG00000266289		ENSG00000003137	CYP26B1
ENSG00000255874	LINC00346	ENSG00000164236	ANKRD33B	ENSG00000142552	RCN3
ENSG00000081041	CXCL2	ENSG00000212552	SNORD91B	ENSG00000228703
ENSG00000189238	LINC00943	ENSG00000251896	SNORD116-27	ENSG00000196793	ZNF239
ENSG00000137860	SLC28A2	ENSG00000232973	CYP1B1-AS1	ENSG00000128011	LRFN1
ENSG00000169884	WNT10B	ENSG00000253667		ENSG00000178776	C5orf46
ENSG00000255092	AC010768.2	ENSG00000208317	SNORD78	ENSG00000184207	PGP
ENSG00000183111	ARHGEF37	ENSG00000157404	KIT	ENSG00000114019	AMOTL2
ENSG00000177725	AC105206.1	ENSG00000222068	RN7SKP154	ENSG00000158748	HTR6
ENSG00000165816	VWA2	ENSG00000222744	RN7SKP166	ENSG00000134461	ANKRD16
ENSG00000237927	AL078604.2	ENSG00000268262		ENSG00000219470
ENSG00000279096	AL356289.3	ENSG00000161940	BCL6B	ENSG00000102879	CORO1A
ENSG00000170323	FABP4	ENSG00000224255	PDCL3P6	ENSG00000175745	NR2F1
ENSG00000121858.	TNFSF10	ENSG00000122877	EGR2	ENSG00000179294	C17orf96
ENSG00000111186	WNT5B	ENSG00000227008		ENSG00000102967	DHODH
ENSG00000134198	TSPAN2	ENSG00000238886	SNORD121A	ENSG00000200959	SNORA74A
ENSG00000274383	AC103691.1	ENSG00000256103		ENSG00000163661	PTX3
ENSG00000204936	CD177	ENSG00000170454	KRT75	ENSG00000235505
ENSG00000253125	AC055854.1	ENSG00000117877	CD3EAP	ENSG00000206885	SNORA75
ENSG00000224063	AC007319.1	ENSG00000247627	MTND4P12	ENSG00000148604	RGR
ENSG00000185633	NDUFA4L2	ENSG00000110975	SYT10	ENSG00000175445	LPL
ENSG00000106366	SERPINE1	ENSG00000136371	MTHFS	ENSG00000133401	PDZD2
ENSG00000173093	CCDC63	ENSG00000235559		ENSG00000123545	NDUFAF4
ENSG00000260661	AC116903.2	ENSG00000251105		ENSG00000121440	PDZRN3
ENSG00000253669	AP003356.1	ENSG00000231485		ENSG00000107815	C10orf2
ENSG00000108342	CSF3	ENSG00000260608		ENSG00000174749	C4orf32
ENSG00000179388	EGR3	ENSG00000220008	LINGO3	ENSG00000155189	AGPAT5
ENSG00000169129	AFAP1L2	ENSG00000145220	LYAR	ENSG00000164393	GPR111
ENSG00000271795	AC011337.1	ENSG00000109861	CTSC	ENSG00000225614	ZNF469
ENSG00000135547	HEY2	ENSG00000178623	GPR35	ENSG00000267607
ENSG00000233929	MT1XP1	ENSG00000174939	ASPHD1	ENSG00000176692	FOXC2
ENSG00000231587	SNORD62B	ENSG00000157542	KCNJ6	ENSG00000110104	CCDC86
ENSG00000177839	PCDHB9	ENSG00000128805	ARHGAP22	ENSG00000115946	PNO1
ENSG00000121101	TEX14	ENSG00000253051		ENSG00000129911	KLF16
ENSG00000180537	RNF182	ENSG00000236333	TRHDE-AS1	ENSG00000176595	KBTBD11
ENSG00000125726	CD70	ENSG00000069812	HES2	ENSG00000263350
ENSG00000258137	AC079313.2	ENSG00000168811	IL12A	ENSG00000160606	TLCD1
ENSG00000241112	RPL29P14	ENSG00000236886		ENSG00000164236	ANKRD33B
ENSG00000088002	SULT2B1	ENSG00000272512		ENSG00000137054	POLR1E
ENSG00000143333	RGS16	ENSG00000269745		ENSG00000145248	SLC10A4
ENSG00000103316	CRYM	ENSG00000242692	RPS27AP1	ENSG00000245248	USP2-AS1
ENSG00000234832	AL096677.1	ENSG00000255358		ENSG00000268812
ENSG00000163810	TGM4	ENSG00000077522	ACTN2	ENSG00000075035	WSCD2
ENSG00000262188	LINC01978	ENSG00000212588	SNORA26	ENSG00000245261
ENSG00000279692	AC110285.7	ENSG00000203832	NBPF20	ENSG00000188211	NCR3LG1
ENSG00000171368	TPPP	ENSG00000178430		ENSG00000237162
ENSG00000145107	TM4SF19	ENSG00000133863	TEX15	ENSG00000188883	KLRG2
ENSG00000002079	MYH16	ENSG00000213070	HMGB3P6	ENSG00000108691	CCL2
ENSG00000265933	LINC00668	ENSG00000162981	FAM84A	ENSG00000250899
ENSG00000151014	NOCT	ENSG00000241438	TDGF1P6	ENSG00000227698
ENSG00000270806	C17orf50	ENSG00000064692	SNCAIP	ENSG00000163083	INHBB
ENSG00000261222	AC064805.1	ENSG00000222472	RN7SKP7	ENSG00000164687	FABP5
ENSG00000178573	MAF	ENSG00000207134	RNU6-106P	ENSG00000105173	CCNE1
ENSG00000223485	LINC01615	ENSG00000251898	SCARNA11	ENSG00000227220
ENSG00000272841	AL139393.2	ENSG00000222076	RNU2-3P	ENSG00000161405	IKZF3
ENSG00000175344	CHRNA7	ENSG00000223336	RNU2-6P	ENSG00000222041	LINC00152
ENSG00000117595	IRF6	ENSG00000186472	PCLO	ENSG00000224959
ENSG00000076641	PAG1	ENSG00000169860	P2RY1	ENSG00000168505	GBX2
ENSG00000050730	TNIP3	ENSG00000226887	ERVMER34-1	ENSG00000188763	FZD9
ENSG00000165182	CXorf58	ENSG00000202400	SNORD82	ENSG00000171282
ENSG00000125347	IRF1	ENSG00000264585	MIR4449	ENSG00000256813
ENSG00000136059	VILL	ENSG00000204538	PSORS1C2	ENSG00000076641	PAG1
ENSG00000108821	COL1A1	ENSG00000202031	SNORD38A	ENSG00000223551	TMSB4XP4
ENSG00000170577	SIX2	ENSG00000221066	SNORD111	ENSG00000048162	NOP16
ENSG00000187134	AKR1C1	ENSG00000136938	ANP32B	ENSG00000266950
ENSG00000138316	ADAMTS14	ENSG00000202111	VTRNA1-2	ENSG00000155846	PPARGC1B
ENSG00000268201	AC020915.3	ENSG00000128045	RASL11B	ENSG00000137124	ALDH1B1
ENSG00000250321	AC079140.2	ENSG00000125462	C1orf61	ENSG00000182500	ORAI1
ENSG00000224750	AL391704.1	ENSG00000090273	NUDC	ENSG00000196756	SNHG17
ENSG00000282057	AC092807.3	ENSG00000204950	LRRC10B	ENSG00000108001	EBF3
ENSG00000130822	PNCK	ENSG00000256341		ENSG00000118407	FILIP1
ENSG00000182310	SPACA6	ENSG00000048162	NOP16	ENSG00000141622	RNF165
ENSG00000102804	TSC22D1	ENSG00000246889		ENSG00000110660	SLC35F2
ENSG00000276067	AC009542.2	ENSG00000124813	RUNX2	ENSG00000143179	UCK2
ENSG00000256304	CCDC150P1	ENSG00000212304	SNORD12	ENSG00000270109
ENSG00000177191	B3GNT8	ENSG00000201875	RN7SKP178	ENSG00000164933	SLC25A32
ENSG00000177614	PGBD5	ENSG00000233954		ENSG00000132768	DPH2
ENSG00000153294	ADGRF4	ENSG00000199319	RN7SKP25	ENSG00000142627	EPHA2
ENSG00000143367	TUFT1	ENSG00000239183	SNORA84	ENSG00000153574	RPIA
ENSG00000156427	FGF18	ENSG00000107623	GDF10	ENSG00000167695	FAM57A
ENSG00000172073	TEX37	ENSG00000241732		ENSG00000111845	PAK1IP1
ENSG00000250303	AP002884.3	ENSG00000239043	SNORD127	ENSG00000165572	KBTBD6
ENSG00000089116	LHX5	ENSG00000137571	SLCO5A1	ENSG00000265790	RNASEH1P1
ENSG00000182575	NXPH3	ENSG00000222365	SNORD12B	ENSG00000256006
ENSG00000229677	AC018644.1	ENSG00000207808	MIR27A	ENSG00000261533
ENSG00000151790	TDO2	ENSG00000137672	TRPC6	ENSG00000140284	SLC27A2
ENSG00000156675	RAB11FIP1	ENSG00000244921		ENSG00000173295	FAM86B3P
ENSG00000182621	PLCB1	ENSG00000222976	RN7SKP94	ENSG00000259863	SH3RF3-AS1
ENSG00000142871	CYR61	ENSG00000251279		ENSG00000099998	GGT5
ENSG00000205710	C17orf107	ENSG00000225933		ENSG00000163395	IGFN1
ENSG00000236060	HSPB1P1	ENSG00000242860	RN7SL180P	ENSG00000071539	TRIP13
ENSG00000237819	AC002454.1	ENSG00000250116		ENSG00000062282	DGAT2
ENSG00000230979	AC079250.1	ENSG00000226647		ENSG00000119919	NKX2-3
ENSG00000168386	FILIP1L	ENSG00000154608	CEP170P1	ENSG00000112941	PAPD7
ENSG00000021355	SERPINB1	ENSG00000206903		ENSG00000265145	SNORD53
ENSG00000136695	IL36RN	ENSG00000101311	FERMT1	ENSG00000128714	HOXD13
ENSG00000278341	AC138028.6	ENSG00000201882		ENSG00000171056	SOX7
ENSG00000184371	CSF1	ENSG00000235436	DPY19L2P4	ENSG00000082516	GEMIN5
ENSG00000145632	PLK2	ENSG00000204150	CTGLF11P	ENSG00000132603	NIP7
ENSG00000129437	KLK14	ENSG00000226928	RPS14P4	ENSG00000171631	P2RY6
ENSG00000249816	LINC00964	ENSG00000222985	RNU2-14P	ENSG00000229587
ENSG00000228060	AL365277.2	ENSG00000100593	ISM2	ENSG00000258130
ENSG00000184148	SPRR4	ENSG00000183638	RP1L1	ENSG00000255366
ENSG00000183729	NPBWR1	ENSG00000139800	ZIC5	ENSG00000120942	UBIAD1
ENSG00000137449	CPEB2	ENSG00000232489	MFAP1P1	ENSG00000163251	FZD5
ENSG00000274021	AC024909.3	ENSG00000227525	RPL7P6	ENSG00000177192	PUS1
ENSG00000169184	MN1	ENSG00000214832	UPF3AP2	ENSG00000221818	EBF2
ENSG00000241923	RPL14P3	ENSG00000189001	SBSN	ENSG00000104043	ATP8B4
ENSG00000157554	ERG	ENSG00000164182	NDUFAF2	ENSG00000132661	NXT1
ENSG00000169067	ACTBL2	ENSG00000255909		ENSG00000124784	RIOK1
ENSG00000258791	LINC00520	ENSG00000270405		ENSG00000142544	CTU1
ENSG00000161638	ITGA5	ENSG00000182583	VCX	ENSG00000055483	USP36
ENSG00000119866	BCL11A	ENSG00000153294	GPR115	ENSG00000168491	CCDC110
ENSG00000166682	TMPRSS5	ENSG00000215252	GOLGA8B	ENSG00000141384	TAF4B
ENSG00000272800	AC021851.1	ENSG00000164610	RP9	ENSG00000253540	FAM86HP
ENSG00000114013	CD86	ENSG00000255500		ENSG00000126953	TIMM8A
ENSG00000237330	RNF223	ENSG00000134533	RERG	ENSG00000269699	ZIM2
ENSG00000170873	MTSS1	ENSG00000225357	RPF2P1	ENSG00000129910	CDH15
ENSG00000222047	C10orf55	ENSG00000201302	SNORA65	ENSG00000188015	S100A3
ENSG00000222713	RN7SKP51	ENSG00000133256	PDE6B	ENSG00000102962	CCL22
ENSG00000126561	STAT5A	ENSG00000186603	HPDL	ENSG00000150051	MKX
ENSG00000278765	AC004477.3	ENSG00000268702		ENSG00000227456	LINC00310
ENSG00000129521	EGLN3	ENSG00000128594	LRRC4	ENSG00000271127
ENSG00000081277	PKP1	ENSG00000180044	C3orf80	ENSG00000112578	BYSL
ENSG00000231999	FLJ27354	ENSG00000020633	RUNX3	ENSG00000114767	RRP9
ENSG00000274949	AL109804.1	ENSG00000233762		ENSG00000086506	HBQ1
ENSG00000275198	AL512791.2	ENSG00000251667		ENSG00000169429	IL8
ENSG00000163126	ANKRD23	ENSG00000177453	NIM1K	ENSG00000173846	PLK3
ENSG00000260103	AC012435.1	ENSG00000145494	NDUFS6	ENSG00000145990	GFOD1
ENSG00000105141	CASP14	ENSG00000234031	RPS3AP44	ENSG00000136158	SPRY2
ENSG00000241106	HLA-DOB	ENSG00000158417	EIF5B	ENSG00000085415	SEH1L
ENSG00000272902	TBC1D8-AS1	ENSG00000265496	MIR1539	ENSG00000186615	KTN1-AS1
ENSG00000090339	ICAM1	ENSG00000166450	PRTG	ENSG00000238110
ENSG00000168646	AXIN2	ENSG00000185904	LINC00839	ENSG00000123700	KCNJ2
ENSG00000104368	PLAT	ENSG00000161405	IKZF3	ENSG00000126249	PDCD2L
ENSG00000272948	AP001412.1	ENSG00000229007	EXOSC3P1	ENSG00000229447
ENSG00000128594	LRRC4	ENSG00000126368	NR1D1	ENSG00000260452	TPRKBP2
ENSG00000135437	RDH5	ENSG00000201785	SNORD117	ENSG00000251795
ENSG00000189283	FHIT	ENSG00000137841	PLCB2	ENSG00000103404	USP31
ENSG00000255491	AC100858.3	ENSG00000166407	LMO1	ENSG00000100593	ISM2
ENSG00000157111	TMEM171	ENSG00000248795		ENSG00000116675	DNAJC6
ENSG00000274026	FAM27E3	ENSG00000130711	PRDM12	ENSG00000172216	CEBPB
ENSG00000248489	LINC02062	ENSG00000135074	ADAM19	ENSG00000073536	NLE1
ENSG00000198515	CNGA1	ENSG00000076641	PAG1	ENSG00000164038	SLC9B2
ENSG00000115468	EFHD1	ENSG00000136928	GABBR2	ENSG00000105810	CDK6
ENSG00000258793	AL355102.4	ENSG00000252310	RNY5	ENSG00000117318	ID3
ENSG00000162888	C1orf147	ENSG00000169325	GUSBP12	ENSG00000272425
ENSG00000197329	PELI1	ENSG00000112238	PRDM13	ENSG00000233010	RPEP4
ENSG00000118503	TNFAIP3	ENSG00000171421	MRPL36	ENSG00000177822
ENSG00000112414	ADGRG6	ENSG00000208892	SNORA49	ENSG00000124813	RUNX2
ENSG00000230943	LINC02541	ENSG00000254324	MIR151A	ENSG00000166455	C16orf46
ENSG00000151632	AKR1C2	ENSG00000130595	TNNT3	ENSG00000142871	CYR61
ENSG00000053747	LAMA3	ENSG00000115053	NCL	ENSG00000111641	NOP2
ENSG00000188375	H3F3C	ENSG00000272016		ENSG00000242159	ABCF2P1
ENSG00000138207	RBP4	ENSG00000106992	AK1	ENSG00000213185	FAM24B
ENSG00000268621	IGFL2-AS1	ENSG00000269139		ENSG00000118894	FAM86A
ENSG00000187838	PLSCR3	ENSG00000125878	TCF15	ENSG00000255256
ENSG00000162676	GFI1	ENSG00000111490	TBC1D30	ENSG00000261280
ENSG00000225193	AC091167.1	ENSG00000266709		ENSG00000183421	RIPK4
ENSG00000269404	SPIB	ENSG00000264792	MIR4637	ENSG00000183853	KIRREL
ENSG00000182040	USH1G	ENSG00000234961		ENSG00000181418	DDN
ENSG00000167644	C19orf33	ENSG00000267798		ENSG00000120526	NUDCD1
ENSG00000188883	KLRG2	ENSG00000087269	NOP14	ENSG00000165661	QSOX2
ENSG00000274104	AC020910.4	ENSG00000221176	MIR1207	ENSG00000145284	SCD5
ENSG00000199846	RNU1-72P	ENSG00000186322	GOLGA6L17P	ENSG00000121690	DEPDC7
ENSG00000240764	PCDHGC5	ENSG00000197410	DCHS2	ENSG00000165732	DDX21
ENSG00000008056	SYN1	ENSG00000207279	SNORD116-24	ENSG00000240204	SMKR1
ENSG00000134070	IRAK2	ENSG00000273356		ENSG00000228251
ENSG00000121210	TMEM131L	ENSG00000148600	CDHR1	ENSG00000143674
ENSG00000275491	LINC01730	ENSG00000234622		ENSG00000170381	SEMA3E
ENSG00000229153	EPHA1-AS1	ENSG00000164626	KCNK5	ENSG00000213626	LBH
ENSG00000124159	MATN4	ENSG00000199266	SNORA60	ENSG00000262951
ENSG00000132669	RIN2	ENSG00000260671		ENSG00000133740	E2F5
ENSG00000138944	KIAA1644	ENSG00000203737	GPR52	ENSG00000263271
ENSG00000102962	CCL22	ENSG00000090447	TFAP4	ENSG00000137273	FOXF2
ENSG00000115363	EVA1A	ENSG00000269365		ENSG00000164778	EN2
ENSG00000111912	NCOA7	ENSG00000159450	TCHH	ENSG00000225580
ENSG00000143847	PPFIA4	ENSG00000259659		ENSG00000231566
ENSG00000168811	IL12A	ENSG00000232358		ENSG00000176055	MBLAC2
ENSG00000065325	GLP2R	ENSG00000256745		ENSG00000092969	TGFB2
ENSG00000086570	FAT2	ENSG00000261533		ENSG00000182685	BRICD5
ENSG00000137331	IER3	ENSG00000255198	SNHG9	ENSG00000166341	DCHS1
ENSG00000235387	SPAAR	ENSG00000270190		ENSG00000109084	TMEM97
ENSG00000141068	KSR1	ENSG00000272425		ENSG00000232391	RANP2
ENSG00000269113	TRABD2B	ENSG00000129347	KRI1	ENSG00000104524	PYCRL
ENSG00000129991	TNNI3	ENSG00000104055	TGM5	ENSG00000174804	FZD4
ENSG00000142619	PADI3	ENSG00000232454		ENSG00000138166	DUSP5
ENSG00000183929	DUSP5P1	ENSG00000202260	RN7SKP69	ENSG00000171126	KCNG3
ENSG00000182853	VMO1	ENSG00000256618	MTRNR2L1	ENSG00000071073	MGAT4A
ENSG00000119771	KLHL29	ENSG00000069482	GAL	ENSG00000263053
ENSG00000160117	ANKLE1	ENSG00000204588	LINC01123	ENSG00000247077	PGAM5
ENSG00000263235	AC006111.2	ENSG00000255097		ENSG00000198517	MAFK
ENSG00000278356	AC005911.1	ENSG00000138587	MNS1	ENSG00000165689	SDCCAG3
ENSG00000224429	LINC00539	ENSG00000143067	ZNF697	ENSG00000165905	GYLTL1B
ENSG00000123999	INHA	ENSG00000116990	MYCL	ENSG00000104369	JPH1
ENSG00000172216	CEBPB	ENSG00000272449		ENSG00000020633	RUNX3
ENSG00000149927	DOC2A	ENSG00000258684	BMS1P16	ENSG00000198042	MAK16
ENSG00000242951	AC007182.2	ENSG00000197381	ADARB1	ENSG00000145414	NAF1
ENSG00000224287	MSL3P1	ENSG00000129910	CDH15	ENSG00000128564	VGF
ENSG00000246130	AC107959.2	ENSG00000170231	FABP6	ENSG00000231508
ENSG00000143556	S100A7	ENSG00000166707	ZCCHC18	ENSG00000176124	DLEU1
ENSG00000169594	BNC1	ENSG00000259645		ENSG00000050628	PTGER3
ENSG00000228288	PCAT6	ENSG00000233608	TWIST2	ENSG00000173638	SLC19A1
ENSG00000185909	KLHDC8B	ENSG00000222489		ENSG00000165388	ZNF488
ENSG00000086717	PPEF1	ENSG00000135547	HEY2	ENSG00000225300
ENSG00000196611	MMP1	ENSG00000160214	RRP1	ENSG00000183778	B3GALT5
ENSG00000143126	CELSR2	ENSG00000118194	TNNT2	ENSG00000196449	YRDC
ENSG00000118515	SGK1	ENSG00000243280		ENSG00000264462	MIR3648
		ENSG00000117395	EBNA1BP2	ENSG00000197498	RPF2
		ENSG00000226221		ENSG00000134107	BHLHE40
		ENSG00000144161	ZC3H8	ENSG00000165271	NOL6
		ENSG00000249119	MTND6P4	ENSG00000132763	MMACHC
		ENSG00000198576	ARC	ENSG00000116922	C1orf109
		ENSG00000231863		ENSG00000261730
		ENSG00000245248	USP2-AS1	ENSG00000256234
		ENSG00000185112	FAM43A	ENSG00000231184	FAM58DP
		ENSG00000163632	C3orf49	ENSG00000207468	SNORA19
		ENSG00000163235	TGFA	ENSG00000050555	LAMC3
		ENSG00000224861	YBX1P1	ENSG00000232486
		ENSG00000155761	SPAG17	ENSG00000115758	ODC1
		ENSG00000242559	RN7SL144P	ENSG00000233903
		ENSG00000232623		ENSG00000125813	PAX1
		ENSG00000227688	HNRNPA3P2	ENSG00000197905	TEAD4
		ENSG00000248327		ENSG00000239672	NME1
		ENSG00000156675	RAB11FIP1	ENSG00000178440	LINC00843
		ENSG00000155846	PPARGC1B	ENSG00000198734	F5
		ENSG00000239528		ENSG00000138442	WDR12
		ENSG00000252503	RNU6-531P	ENSG00000007264	MATK
		ENSG00000231167	YBX1P2	ENSG00000251745	RNU7-124P
		ENSG00000134470	IL15RA	ENSG00000241175	RN7SL494P
		ENSG00000168412	MTNR1A	ENSG00000131187	F12
		ENSG00000259118		ENSG00000264584	RN7SL600P
		ENSG00000261529		ENSG00000083635	NUFIP1
		ENSG00000206885	SNORA75	ENSG00000273190
		ENSG00000239014	SNORD108	ENSG00000164116	GUCY1A3
		ENSG00000207780	MIR648	ENSG00000107338	SHB
		ENSG00000109063	MYH3	ENSG00000143942	CHAC2
		ENSG00000202392	RN7SKP292	ENSG00000142207	URB1
		ENSG00000261594	TPBGL	ENSG00000156017	C9orf41
		ENSG00000223802	CERS1	ENSG00000178695	KCTD12
		ENSG00000267939		ENSG00000227992
		ENSG00000202538	RNU4-2	ENSG00000171793	CTPS1
		ENSG00000197744	PTMAP2	ENSG00000204950	LRRC10B
		ENSG00000257270		ENSG00000116337	AMPD2
		ENSG00000141456	PELP1	ENSG00000188807	TMEM201
		ENSG00000086570	FAT2	ENSG00000165929	TC2N
		ENSG00000262966		ENSG00000233237	LINC00472
		ENSG00000130254	SAFB2	ENSG00000182118	FAM89A
		ENSG00000096696	DSP	ENSG00000186523	FAM86B1
		ENSG00000264198		ENSG00000100162	CENPM
		ENSG00000138061	CYP1B1	ENSG00000186654	PRR5
		ENSG00000189149	CRYM-AS1	ENSG00000203761	MSTO2P
		ENSG00000185479	KRT6B	ENSG00000215417	MIR17HG
		ENSG00000179041	RRS1	ENSG00000225648	SBDSP1
		ENSG00000231106		ENSG00000266967	AARSD1
		ENSG00000255256		ENSG00000234602	MCIDAS
		ENSG00000199691	RN7SKP173	ENSG00000073008	PVR
		ENSG00000105617	LENG1	ENSG00000174791	RIN1
		ENSG00000251323		ENSG00000155367	PPM1J
		ENSG00000143256	PFDN2	ENSG00000134987	WDR36
		ENSG00000086712	TXLNG	ENSG00000223802	CERS1
		ENSG00000261054		ENSG00000221176	MIR1207
		ENSG00000268945		ENSG00000113460	BRIX1
		ENSG00000266638		ENSG00000222345
		ENSG00000061918	GUCY1B3	ENSG00000272273
		ENSG00000213683		ENSG00000219902	RPL35P3
		ENSG00000207217		ENSG00000111837	MAK
		ENSG00000258749		ENSG00000171208	NETO2
		ENSG00000141622	RNF165	ENSG00000232956	SNHG15
		ENSG00000230325		ENSG00000259767
		ENSG00000260936	FTO-IT1	ENSG00000130826	DKC1
		ENSG00000213137	ARF1P2	ENSG00000108179	PPIF
		ENSG00000230202		ENSG00000196497	IPO4
		ENSG00000087258	GNAO1	ENSG00000016402	IL20RA
		ENSG00000200472	RN7SKP44	ENSG00000052749	RRP12
		ENSG00000228118		ENSG00000184809	C21orf88
		ENSG00000201592		ENSG00000260924
		ENSG00000240211		ENSG00000266237
		ENSG00000263271		ENSG00000235173	FAM203A
		ENSG00000185634	SHC4	ENSG00000254982	HMGB1P24
		ENSG00000268739		ENSG00000149948	HMGA2
		ENSG00000077935	SMC1B	ENSG00000271833
		ENSG00000213866	YBX1P10	ENSG00000140479	PCSK6
		ENSG00000145536	ADAMTS16	ENSG00000133316	WDR74
		ENSG00000215492	HNRNPA1P7	ENSG00000061918	GUCY1B3
		ENSG00000125285	SOX21	ENSG00000159958	TNFRSF13C
		ENSG00000178105	DDX10	ENSG00000020129	NCDN
		ENSG00000175768	TOMM5	ENSG00000116819	TFAP2E
		ENSG00000215302		ENSG00000239282	GATSL3
		ENSG00000261916		ENSG00000077348	EXOSC5
		ENSG00000265749		ENSG00000267798
		ENSG00000165502	RPL36AL	ENSG00000268144	NIFKP6
		ENSG00000234062		ENSG00000184557	SOCS3
		ENSG00000213058		ENSG00000163811	WDR43
		ENSG00000213613		ENSG00000215910	C1orf167
		ENSG00000132467	UTP3	ENSG00000266946	MRPL37P1
		ENSG00000130826	DKC1	ENSG00000120708	TGFBI
		ENSG00000235081		ENSG00000243373	RN7SL173P
		ENSG00000209042	SNORD12C	ENSG00000183729	NPBWR1
		ENSG00000236264	RPL26P30	ENSG00000160193	WDR4
		ENSG00000254859		ENSG00000223620	RBM48P1
		ENSG00000178162	FAR2P2	ENSG00000249176
		ENSG00000105202	FBL	ENSG00000269982
		ENSG00000213085	CCDC19	ENSG00000104140	RHOV
		ENSG00000151617	EDNRA	ENSG00000037897	METTL1
		ENSG00000198157	HMGN5	ENSG00000249020	SNORA58
		ENSG00000112159	MDN1	ENSG00000260276
		ENSG00000180066	C10orf91	ENSG00000111859	NEDD9
		ENSG00000187667	WHAMMP3	ENSG00000130713	EXOSC2
		ENSG00000213371	NAP1L1P3	ENSG00000128050	PAICS
		ENSG00000219102	HNRNPA3P12	ENSG00000237491
		ENSG00000102539	MLNR	ENSG00000189149	CRYM-AS1
		ENSG00000110484	SCGB2A2	ENSG00000205927	OLIG2
		ENSG00000122497	NBPF14	ENSG00000115457	IGFBP2
		ENSG00000267607		ENSG00000140280	LYSMD2
		ENSG00000204856	FAM216A	ENSG00000158470	B4GALT5
		ENSG00000242562	DCAF13P1	ENSG00000155438	NIFK
		ENSG00000157782	CABP1	ENSG00000198142	SOWAHC
		ENSG00000188290	HES4	ENSG00000197943	PLCG2
		ENSG00000246526		ENSG00000179148	ALOXE3
		ENSG00000240583	AQP1	ENSG00000269899
		ENSG00000260318	COX6CP1	ENSG00000116649	SRM
		ENSG00000269946		ENSG00000231864
		ENSG00000270103	RNU11	ENSG00000174177	CTU2
		ENSG00000242159	ABCF2P1	ENSG00000198300	PEG3
		ENSG00000158748	HTR6	ENSG00000213221	DNLZ
		ENSG00000250917		ENSG00000152642	GPD1L
		ENSG00000115539	PDCL3	ENSG00000260196
		ENSG00000227110	LMCD1-AS1	ENSG00000256185
		ENSG00000162191	UBXN1	ENSG00000130590	SAMD10
		ENSG00000103184	SEC14L5	ENSG00000260633
		ENSG00000133937	GSC	ENSG00000165556	CDX2
		ENSG00000224959		ENSG00000184162	NR2C2AP
		ENSG00000206634	SNORA22	ENSG00000260910	LINC00565
		ENSG00000187193	MT1X	ENSG00000151789	ZNF385D
		ENSG00000254982	HMGB1P24	ENSG00000198756	COLGALT2
		ENSG00000148296	SURF6	ENSG00000138018	EPT1
		ENSG00000228366		ENSG00000182057
		ENSG00000214999		ENSG00000115221	ITGB6
		ENSG00000168061	SAC3D1	ENSG00000102743	SLC25A15
		ENSG00000222348	RNU6-814P	ENSG00000140743	CDR2
		ENSG00000105258	POLR2I	ENSG00000264508	RN7SL473P
		ENSG00000185453	C19orf68	ENSG00000125459	MSTO1
		ENSG00000162783	IER5	ENSG00000224420	ADM5
		ENSG00000237278	RLIMP2	ENSG00000117245	KIF17
		ENSG00000216141	MIR941-2	ENSG00000160401	C9orf117
		ENSG00000160799	CCDC12	ENSG00000170837	GPR27
		ENSG00000016402	IL20RA	ENSG00000178764	ZHX2
		ENSG00000253372		ENSG00000163132	MSX1
		ENSG00000169857	AVEN	ENSG00000186767	SPIN4
		ENSG00000104131	EIF3J	ENSG00000173145	NOC3L
		ENSG00000184220	CMSS1	ENSG00000133863	TEX15
		ENSG00000179066		ENSG00000111300	NAA25
		ENSG00000160633	SAFB	ENSG00000136718	IMP4
		ENSG00000224058		ENSG00000109519	GRPEL1
		ENSG00000221164		ENSG00000157111	TMEM171
		ENSG00000206952	SNORA50	ENSG00000180611	MB21D2
		ENSG00000249780		ENSG00000130829	DUSP9
		ENSG00000178773	CPNE7	ENSG00000167747	C19orf48
		ENSG00000112394	SLC16A10	ENSG00000130810	PPAN
		ENSG00000254207		ENSG00000148843	PDCD11
		ENSG00000260464		ENSG00000033867	SLC4A7
		ENSG00000272056		ENSG00000224707	E2F3-IT1
		ENSG00000117174	ZNHIT6	ENSG00000118707	TGIF2
		ENSG00000258365		ENSG00000110076	NRXN2
		ENSG00000102804	TSC22D1	ENSG00000224635
		ENSG00000189007	ADAT2	ENSG00000198440	ZNF583
		ENSG00000228703		ENSG00000180834	MAP6D1
		ENSG00000238082		ENSG00000117013	KCNQ4
		ENSG00000202241	RN7SKP186	ENSG00000183783	KCTD8
		ENSG00000173588	CCDC41	ENSG00000236200	KDM4A-AS1
		ENSG00000119946	CNNM1	ENSG00000158483	FAM86C1
		ENSG00000108270	AATF	ENSG00000254244	PAICSP4
		ENSG00000235852		ENSG00000261798
		ENSG00000244306		ENSG00000241945	PWP2
		ENSG00000168491	CCDC110	ENSG00000196083	IL1RAP
		ENSG00000183729	NPBWR1	ENSG00000161960	EIF4A1
		ENSG00000263235		ENSG00000230844	ZNF674-AS1
		ENSG00000163909	HEYL	ENSG00000267041	ZNF850
		ENSG00000237238	BMS1P10	ENSG00000111490	TBC1D30
		ENSG00000266995		ENSG00000164338	UTP15
		ENSG00000170542	SERPINB9	ENSG00000120158	RCL1
		ENSG00000243479	MNX1-AS1	ENSG00000226121	AHCTF1P1
		ENSG00000264769		ENSG00000136933	RABEPK
		ENSG00000127533	F2RL3	ENSG00000259750
		ENSG00000050767	COL23A1	ENSG00000185818	NAT8L
		ENSG00000119707	RBM25	ENSG00000179409	GEMIN4
		ENSG00000256304		ENSG00000230650
		ENSG00000043355	ZIC2	ENSG00000072041	SLC6A15
		ENSG00000189046	ALKBH2	ENSG00000233785
		ENSG00000112320	SOBP	ENSG00000172458	IL17D
		ENSG00000254726	MEX3A	ENSG00000124571	XPO5
		ENSG00000205609	EIF3CL	ENSG00000266066	POLRMTP1
		ENSG00000205867	KRTAP5-2	ENSG00000231713
		ENSG00000163376	KBTBD8	ENSG00000216740	ANXA2P3
		ENSG00000269688		ENSG00000204856	FAM216A
		ENSG00000232803		ENSG00000100522	GNPNAT1
		ENSG00000165810	BTNL9	ENSG00000198805	PNP
		ENSG00000184368	MAP7D2	ENSG00000144369	FAM171B
		ENSG00000234788	HSPA8P3	ENSG00000273489
		ENSG00000242229	RPS3AP14	ENSG00000177272	KCNA3
		ENSG00000232112	TMA7	ENSG00000259659
		ENSG00000103550	KNOP1	ENSG00000163528	CHCHD4
		ENSG00000169249	ZRSR2	ENSG00000161980	POLR3K
		ENSG00000255837	TAS2R20	ENSG00000272163
		ENSG00000161980	POLR3K	ENSG00000163235	TGFA
		ENSG00000268460		ENSG00000242261
		ENSG00000256905		ENSG00000189337	KAZN
		ENSG00000248489		ENSG00000165309	ARMC3
		ENSG00000200091	RN7SKP163	ENSG00000261428
		ENSG00000264608		ENSG00000184886	PIGW
		ENSG00000267127		ENSG00000108021	FAM208B
		ENSG00000169297	NR0B1	ENSG00000213222
		ENSG00000225210		ENSG00000164163	ABCE1
		ENSG00000271043	MTRNR2L2	ENSG00000144136	SLC20A1
		ENSG00000139343	SNRPF	ENSG00000165724	ZMYND19
		ENSG00000246334	PRR7-AS1	ENSG00000067533	RRP15
		ENSG00000260466		ENSG00000140022	STON2
		ENSG00000233347	ERP29P1	ENSG00000227195	MIR663A
		ENSG00000230565	ZNF32-AS2	ENSG00000140650	PMM2
		ENSG00000269893	SNHG8	ENSG00000168906	MAT2A
		ENSG00000213197		ENSG00000235978
		ENSG00000118777	ABCG2	ENSG00000199237	RNU6-834P
		ENSG00000185245	GP1BA	ENSG00000138685	FGF2
		ENSG00000227339	THRAP3P1	ENSG00000138028	CGREF1
		ENSG00000270072		ENSG00000144231	POLR2D
		ENSG00000136099	PCDH8	ENSG00000027697	IFNGR1
		ENSG00000180747		ENSG00000234231
		ENSG00000267251		ENSG00000251669	FAM86EP
		ENSG00000233010	RPEP4	ENSG00000138035	PNPT1
		ENSG00000263089		ENSG00000169131	ZNF354A
		ENSG00000235613	NSRP1P1	ENSG00000272658
		ENSG00000109534	GAR1	ENSG00000261705
		ENSG00000201901	RN7SKP48	ENSG00000223820	CFL1P1
		ENSG00000186235		ENSG00000167775	CD320
		ENSG00000149328	GLB1L2	ENSG00000163002	NUP35
		ENSG00000101361	NOP56	ENSG00000198298	ZNF485
		ENSG00000235875	ARHGEF7-AS2	ENSG00000140511	HAPLN3
		ENSG00000167244	IGF2	ENSG00000259370
		ENSG00000260727	SLC7A5P1	ENSG00000246145
		ENSG00000207392	SNORA20	ENSG00000171223	JUNB
		ENSG00000170727	BOP1	ENSG00000203999
		ENSG00000071859	FAM50A	ENSG00000106302	HYAL4
		ENSG00000026559	KCNG1	ENSG00000207280	SNORD20
		ENSG00000178977	LINC00324	ENSG00000172965	MIR4435-1HG
		ENSG00000085511	MAP3K4	ENSG00000273275
		ENSG00000235848	RMDN2-AS1	ENSG00000047634	SCML1
		ENSG00000253683		ENSG00000132330	SCLY
		ENSG00000202217	RN7SKP47	ENSG00000236269	ENO1-IT1
		ENSG00000207110	RNU1-106P	ENSG00000131323	TRAF3
		ENSG00000200913	SNORD46	ENSG00000036672	USP2
		ENSG00000158715	SLC45A3	ENSG00000125968	ID1
		ENSG00000236305		ENSG00000224886	BEND3P3
		ENSG00000270903	HNRNPA3P9	ENSG00000068654	POLR1A
		ENSG00000230823	CBX1P1	ENSG00000119547	ONECUT2
		ENSG00000185222	WBP5	ENSG00000162004	CCDC78
		ENSG00000222969	RN7SKP8	ENSG00000146909	NOM1
		ENSG00000221491	SNORA34	ENSG00000149596	JPH2
		ENSG00000267260		ENSG00000224531	SMIM13
		ENSG00000268950		ENSG00000230082	PRRT3-AS1
		ENSG00000270813	NANOGNBP3	ENSG00000187583	PLEKHN1
		ENSG00000234709	UPF3AP3	ENSG00000218996
		ENSG00000199197	RN7SKP72	ENSG00000196562	SULF2
		ENSG00000256188	TAS2R30	ENSG00000178896	EXOSC4
		ENSG00000224822	THRB-IT1	ENSG00000141076	CIRH1A
		ENSG00000244256	RN7SL130P	ENSG00000119599	DCAF4
		ENSG00000124915		ENSG00000124787	RPP40
		ENSG00000232702		ENSG00000148154	UGCG
		ENSG00000237476		ENSG00000107719	PALD1
		ENSG00000269524		ENSG00000132382	MYBBP1A
		ENSG00000232320		ENSG00000173530	TNFRSF10D
		ENSG00000176055	MBLAC2	ENSG00000230325
		ENSG00000198723	C19orf45	ENSG00000053372	MRTO4
		ENSG00000034053	APBA2	ENSG00000148459	PDSS1
		ENSG00000230212		ENSG00000101489	CELF4
		ENSG00000163528	CHCHD4	ENSG00000080608	KIAA0020
		ENSG00000224877	C17orf89	ENSG00000236792
		ENSG00000267062		ENSG00000167536	DHRS13
		ENSG00000115274	INO80B	ENSG00000081692	JMJD4
		ENSG00000212135	SNORD67	ENSG00000164045	CDC25A
		ENSG00000254109	RBPMS-AS1	ENSG00000175691	ZNF77
		ENSG00000105889	STEAP1B	ENSG00000107562	CXCL12
		ENSG00000247626	MARS2	ENSG00000226971
		ENSG00000091127	PUS7	ENSG00000135372	NAT10
		ENSG00000263707		ENSG00000091127	PUS7
		ENSG00000185298	CCDC137	ENSG00000260698
		ENSG00000157890	MEGF11	ENSG00000183779	ZNF703
		ENSG00000271933		ENSG00000113739	STC2
		ENSG00000268211		ENSG00000109881	CCDC34
		ENSG00000237813		ENSG00000143815	LBR
		ENSG00000183431	SF3A3	ENSG00000249859	PVT1
		ENSG00000254791	FAR1-IT1	ENSG00000149798	CDC42EP2
		ENSG00000198242	RPL23A	ENSG00000267127
		ENSG00000065989	PDE4A	ENSG00000171612	SLC25A33
		ENSG00000106852	LHX6	ENSG00000164920	OSR2
		ENSG00000119698	PPP4R4	ENSG00000198342	ZNF442
		ENSG00000186193	SAPCD2	ENSG00000162851	TFB2M
		ENSG00000189212	DPY19L2P1	ENSG00000232545
		ENSG00000083454	P2RX5	ENSG00000231940	RPS7P3
		ENSG00000250731	TPM3P6	ENSG00000103064	SLC7A6
		ENSG00000232838	PET117	ENSG00000263707
		ENSG00000204220	PFDN6	ENSG00000171970	ZNF57
		ENSG00000236165	PRADC1P1	ENSG00000150687	PRSS23
		ENSG00000179542	SLITRK4	ENSG00000177788
		ENSG00000268525		ENSG00000167721	TSR1
		ENSG00000266801		ENSG00000103253	HAGHL
		ENSG00000230291		ENSG00000183579	ZNRF3
		ENSG00000162367	TAL1	ENSG00000128567	PODXL
		ENSG00000075336	TIMM21	ENSG00000179115	FARSA
		ENSG00000267263		ENSG00000112218	GPR63
		ENSG00000130751	NPAS1	ENSG00000244165	P2RY11
		ENSG00000164107	HAND2	ENSG00000162377	COA7
		ENSG00000134186	PRPF38B	ENSG00000119946	CNNM1
		ENSG00000232526		ENSG00000138623	SEMA7A
		ENSG00000168824		ENSG00000103326	CAPN15
		ENSG00000172361	CCDC11	ENSG00000128203	ASPHD2
		ENSG00000121851	POLR3GL	ENSG00000270381
		ENSG00000200795	RNU4-1	ENSG00000212719	C17orf51
		ENSG00000200792	SNORA80	ENSG00000267562
		ENSG00000251230		ENSG00000271722
		ENSG00000075618	FSCN1	ENSG00000168924	LETM1
		ENSG00000184232	OAF	ENSG00000159208	C1orf51
		ENSG00000201643	SNORA14A	ENSG00000087263	OGFOD1
		ENSG00000273004		ENSG00000078401	EDN1
		ENSG00000203836	NBPF24	ENSG00000125485	DDX31
		ENSG00000168404	MLKL	ENSG00000111696	NT5DC3
		ENSG00000005513	SOX8	ENSG00000217930	PAM16
		ENSG00000248873	SERBP1P6	ENSG00000229944
		ENSG00000183242	WT1-AS	ENSG00000117877	CD3EAP
		ENSG00000266352	RN7SL192P	ENSG00000164932	CTHRC1
		ENSG00000196683	TOMM7	ENSG00000090447	TFAP4
		ENSG00000235530		ENSG00000099250	NRP1
		ENSG00000200394	SNORA38B	ENSG00000251774	RNU6-377P
		ENSG00000100142	POLR2F	ENSG00000257553
		ENSG00000136819	C9orf78	ENSG00000123600	METTL8
		ENSG00000254093	PINX1	ENSG00000170515	PA2G4
		ENSG00000004838	ZMYND10	ENSG00000130204	TOMM40
		ENSG00000115268	RPS15	ENSG00000224908	TIMM8BP2
		ENSG00000181798	LINC00471	ENSG00000005100	DHX33
		ENSG00000272267		ENSG00000230815
		ENSG00000184428	TOP1MT	ENSG00000259895
		ENSG00000126249	PDCD2L	ENSG00000253372
		ENSG00000212158	SNORD66	ENSG00000217624
		ENSG00000072657	TRHDE	ENSG00000161179	YDJC
		ENSG00000200867	RN7SKP36	ENSG00000189377	CXCL17
		ENSG00000273113		ENSG00000160214	RRP1
		ENSG00000142864	SERBP1	ENSG00000172183	ISG20
		ENSG00000185567	AHNAK2	ENSG00000150990	DHX37
		ENSG00000215006	CHCHD2P2	ENSG00000153933	DGKE
		ENSG00000232282	MTND1P32	ENSG00000226928	RPS14P4
		ENSG00000251151	HOXC-AS3	ENSG00000259479
		ENSG00000263680		ENSG00000152137	HSPB8
		ENSG00000149929	HIRIP3	ENSG00000175772	LINC01106
		ENSG00000201967	RN7SKP22	ENSG00000103264	FBXO31
		ENSG00000176641	RNF152	ENSG00000258284	POLR2KP1
		ENSG00000153774	CFDP1	ENSG00000142528	ZNF473
		ENSG00000187486	KCNJ11	ENSG00000179965	ZNF771
		ENSG00000253943	KRT18P37	ENSG00000145506	NKD2
		ENSG00000248734		ENSG00000182022	CHST15
		ENSG00000171105	INSR	ENSG00000006634	DBF4
		ENSG00000198040	ZNF84	ENSG00000151006	PRSS53
		ENSG00000266965		ENSG00000244026	FAM86DP
		ENSG00000257674		ENSG00000105679	GAPDHS
		ENSG00000093217	XYLB	ENSG00000166197	NOLC1
		ENSG00000091482	SMPX	ENSG00000181915	ADO
		ENSG00000134757	DSG3	ENSG00000235651
		ENSG00000136286	MYO1G	ENSG00000159166	LAD1
		ENSG00000107581	EIF3A	ENSG00000169991	IFFO2
		ENSG00000160208	RRP1B	ENSG00000270878
		ENSG00000249249		ENSG00000117174	ZNHIT6
		ENSG00000225614	ZNF469	ENSG00000231622
		ENSG00000198053	SIRPA	ENSG00000212615
		ENSG00000001497	LAS1L	ENSG00000174595	KLF14
		ENSG00000169020	ATP5I	ENSG00000238317	SNORD11
		ENSG00000261628		ENSG00000271590
		ENSG00000110169	HPX	ENSG00000256981	TAS2R18
		ENSG00000205744	DENND1C	ENSG00000196363	WDR5
		ENSG00000224885	TSSC1-IT1	ENSG00000207697	MIR573
		ENSG00000207008	SNORA54	ENSG00000102098	SCML2
		ENSG00000171490	RSL1D1	ENSG00000251188
		ENSG00000125148	MT2A	ENSG00000134001	EIF2S1
		ENSG00000260190		ENSG00000135521	LTV1
		ENSG00000175868	CALCB	ENSG00000166289	PLEKHF1
		ENSG00000164037	SLC9B1	ENSG00000140092	FBLN5
		ENSG00000258048		ENSG00000168502	SOGA2
		ENSG00000165733	BMS1	ENSG00000116120	FARSB
		ENSG00000155368	DBI	ENSG00000185730	ZNF696
		ENSG00000213492	NT5C3AP1	ENSG00000126368	NR1D1
		ENSG00000065183	WDR3	ENSG00000167524
		ENSG00000259394		ENSG00000204588	LINC01123
		ENSG00000270591		ENSG00000161647	MPP3
		ENSG00000198932	GPRASP1	ENSG00000206838	SNORA5A
		ENSG00000225953	SATB2-AS1	ENSG00000196381	ZNF781
		ENSG00000268201		ENSG00000107937	GTPBP4
		ENSG00000163319	MRPS18C	ENSG00000235090	RPL7L1P3
		ENSG00000214353	VAC14-AS1	ENSG00000149716	ORAOV1
		ENSG00000159685	CHCHD6	ENSG00000074181	NOTCH3
		ENSG00000141384	TAF4B	ENSG00000183785	TUBA8
		ENSG00000222937		ENSG00000259797
		ENSG00000151023	ENKUR	ENSG00000185090	MANEAL
		ENSG00000196873	CBWD3	ENSG00000143811	PYCR2
		ENSG00000167216	KATNAL2	ENSG00000186081	KRT5
		ENSG00000150636	CCDC102B	ENSG00000240445	FOXO3B
		ENSG00000171316	CHD7	ENSG00000258429	PDF
		ENSG00000117614	SYF2	ENSG00000176125	UFSP1
		ENSG00000137265	IRF4	ENSG00000108932	SLC16A6
		ENSG00000222281	RN7SKP111	ENSG00000226723
		ENSG00000117477	CCDC181	ENSG00000122012	SV2C
		ENSG00000199165	MIRLET7A1	ENSG00000120800	UTP20
		ENSG00000120658	ENOX1	ENSG00000266903
		ENSG00000101084	C20orf24	ENSG00000140600	SH3GL3
		ENSG00000186081	KRT5	ENSG00000153207	AHCTF1
		ENSG00000229992	HMGB3P9	ENSG00000139514	SLC7A1
		ENSG00000140511	HAPLN3	ENSG00000160208	RRP1B
		ENSG00000238287		ENSG00000101220	C20orf27
		ENSG00000259368		ENSG00000254093	PINX1
		ENSG00000267167		ENSG00000125285	SOX21
		ENSG00000233844	KCNQ5-IT1	ENSG00000104312	RIPK2
		ENSG00000228510		ENSG00000166582	CENPV
		ENSG00000157837	SPPL3	ENSG00000249375	CASC11
		ENSG00000260778	MIR940	ENSG00000131873	CHSY1
		ENSG00000199730	RN7SKP95	ENSG00000100418	DESI1
		ENSG00000110427	KIAA1549L	ENSG00000154743	TSEN2
		ENSG00000206228	HNRNPA1P4	ENSG00000138074	SLC5A6
		ENSG00000201998	SNORA23	ENSG00000260545
		ENSG00000125046	SSUH2	ENSG00000271852	SNORD11B
		ENSG00000127903	ZNF835	ENSG00000165512	ZNF22
		ENSG00000099290	FAM21A	ENSG00000237828	PA2G4P1
		ENSG00000218426		ENSG00000142178	SIK1
		ENSG00000107815	C10orf2	ENSG00000164134	NAA15
		ENSG00000105926	MPP6	ENSG00000066422	ZBTB11
		ENSG00000199683	RN7SKP185	ENSG00000198046	ZNF667
		ENSG00000165724	ZMYND19	ENSG00000101938	CHRDL1
		ENSG00000183287	CCBE1	ENSG00000124743	KLHL31
		ENSG00000171282		ENSG00000101361	NOP56
		ENSG00000267523		ENSG00000254858	MPV17L2
		ENSG00000234106		ENSG00000235947	EGOT
		ENSG00000137673	MMP7	ENSG00000232623
		ENSG00000038427	VCAN	ENSG00000225536
		ENSG00000156486	KCNS2	ENSG00000235530
		ENSG00000234009	RPL5P34	ENSG00000266606
		ENSG00000250317	SMIM20	ENSG00000130711	PRDM12
		ENSG00000267255		ENSG00000196372	ASB13
		ENSG00000262202	SNORD3D	ENSG00000124216	SNAI1
		ENSG00000123685	BATF3	ENSG00000173465	SSSCA1
		ENSG00000183779	ZNF703	ENSG00000146072	TNFRSF21
		ENSG00000163386	NBPF10	ENSG00000140859	KIFC3
		ENSG00000244218	RN7SL81P	ENSG00000271870
		ENSG00000217241	CBX3P9	ENSG00000183067	IGSF5
		ENSG00000146122	DAAM2	ENSG00000133641	C12orf29
		ENSG00000157111	TMEM171	ENSG00000169217	CD2BP2
		ENSG00000119782	FKBP1B	ENSG00000265800
		ENSG00000111664	GNB3	ENSG00000088756	ARHGAP28
		ENSG00000258757		ENSG00000109861	CTSC
		ENSG00000232303		ENSG00000143320	CRABP2
		ENSG00000110104	CCDC86	ENSG00000076351	SLC46A1
		ENSG00000270394	MTRNR2L13	ENSG00000116032	GRIN3B
		ENSG00000238541		ENSG00000089195	TRMT6
		ENSG00000239559	RPL37P2	ENSG00000101187	SLCO4A1
		ENSG00000160472	TMEM190	ENSG00000235489	DBF4P1
		ENSG00000138669	PRKG2	ENSG00000126790	L3HYPDH
		ENSG00000133142	TCEAL4	ENSG00000140905	GCSH
		ENSG00000120158	RCL1	ENSG00000050344	NFE2L3
		ENSG00000225215	SMARCE1P1	ENSG00000176749	CDK5R1
		ENSG00000251815	SNORD116-26	ENSG00000104368	PLAT
		ENSG00000266795		ENSG00000181619	GPR135
		ENSG00000221771	MIR1205	ENSG00000103546	SLC6A2
		ENSG00000259797		ENSG00000073598	FNDC8
		ENSG00000140259	MFAP1	ENSG00000139832	RAB20
		ENSG00000106125	FAM188B	ENSG00000065911	MTHFD2
		ENSG00000268885		ENSG00000235872
		ENSG00000181619	GPR135	ENSG00000171016	PYGO1
		ENSG00000200087	SNORA73B	ENSG00000158042	MRPL17
		ENSG00000228714		ENSG00000171453	POLR1C
		ENSG00000242318		ENSG00000128626	MRPS12
		ENSG00000007264	MATK	ENSG00000206195
		ENSG00000115556	PLCD4	ENSG00000186017	ZNF566
		ENSG00000237836	PHKA2-AS1	ENSG00000170027	YWHAG
		ENSG00000096060	FKBP5	ENSG00000234917
		ENSG00000124784	RIOK1	ENSG00000138061	CYP1B1
		ENSG00000159958	TNFRSF13C	ENSG00000226180
		ENSG00000252213		ENSG00000214160	ALG3
		ENSG00000113141	IK	ENSG00000074047	GLI2
		ENSG00000198046	ZNF667	ENSG00000107551	RASSF4
		ENSG00000134697	GNL2	ENSG00000231307	RPS3P2
		ENSG00000235191	NUCB1-AS1	ENSG00000034152	MAP2K3
		ENSG00000089048	ESF1	ENSG00000238258
		ENSG00000198945	L3MBTL3	ENSG00000105663	KMT2B
		ENSG00000143793	C1orf35	ENSG00000254206	NPIPB11
		ENSG00000249684		ENSG00000254608
		ENSG00000225356		ENSG00000239919	SNRPGP3
		ENSG00000175467	SART1	ENSG00000242114	MTFP1
		ENSG00000240405		ENSG00000146858	ZC3HAV1L
		ENSG00000230042	AK3P3	ENSG00000186026	ZNF284
		ENSG00000232486		ENSG00000236782
		ENSG00000165506	DNAAF2	ENSG00000100311	PDGFB
		ENSG00000200673	RN7SKP174	ENSG00000163794	UCN
		ENSG00000223224	SNORD71	ENSG00000165548	TMEM63C
		ENSG00000076662	ICAM3	ENSG00000142684	ZNF593
		ENSG00000268621		ENSG00000119285	HEATR1
		ENSG00000104714	ERICH1	ENSG00000104635	SLC39A14
		ENSG00000269246		ENSG00000259924
		ENSG00000005075	POLR2J	ENSG00000259834
		ENSG00000137760	ALKBH8	ENSG00000260966
		ENSG00000255177		ENSG00000228079
		ENSG00000148300	REXO4	ENSG00000254595
		ENSG00000106591	MRPL32	ENSG00000102030	NAA10
		ENSG00000271852	SNORD11B	ENSG00000240135	PSMD12P
		ENSG00000100941	PNN	ENSG00000271466	CICP24
		ENSG00000212163	SNORD91A	ENSG00000177150	FAM210A
		ENSG00000100490	CDKL1	ENSG00000270190
		ENSG00000104369	JPH1	ENSG00000066855	MTFR1
		ENSG00000175602	CCDC85B	ENSG00000115641	FHL2
		ENSG00000273108		ENSG00000183010	PYCR1
		ENSG00000266237		ENSG00000263272
		ENSG00000179348	GATA2	ENSG00000265828	MIR3939
		ENSG00000102390	PBDC1	ENSG00000186416	NKRF
		ENSG00000145526	CDH18	ENSG00000141576	RNF157
		ENSG00000223984	HNRNPRP1	ENSG00000205250	E2F4
		ENSG00000007080	CCDC124	ENSG00000116679	IVNS1ABP
		ENSG00000233593		ENSG00000116132	PRRX1
		ENSG00000146909	NOM1	ENSG00000177483	RBM44
		ENSG00000232832	LMLN-AS1	ENSG00000197381	ADARB1
		ENSG00000272198		ENSG00000141682	PMAIP1
		ENSG00000243005	RN7SL16P	ENSG00000226342	NMD3P1
		ENSG00000181649	PHLDA2	ENSG00000262251
		ENSG00000230216	HSPB1P2	ENSG00000160072	ATAD3B
		ENSG00000116350	SRSF4	ENSG00000226688	ENTPD1-AS1
		ENSG00000264275	RN7SL753P	ENSG00000177542	SLC25A22
		ENSG00000170846		ENSG00000047597	XK
		ENSG00000213144		ENSG00000164845	FAM86FP
		ENSG00000124228	DDX27	ENSG00000258733
		ENSG00000272849		ENSG00000138795	LEF1
		ENSG00000233077		ENSG00000035141	FAM136A
		ENSG00000204574	ABCF1	ENSG00000186193	SAPCD2
		ENSG00000149503	INCENP	ENSG00000240006
		ENSG00000201457	SNORA55	ENSG00000103067	ESRP2
		ENSG00000268056		ENSG00000156113	KCNMA1
		ENSG00000230667	SETSIP	ENSG00000100294	MCAT
		ENSG00000108651	UTP6	ENSG00000186019
		ENSG00000164116	GUCY1A3	ENSG00000270081
		ENSG00000226360	RPL10AP6	ENSG00000185518	SV2B
		ENSG00000272216		ENSG00000115290	GRB14
		ENSG00000104218	CSPP1	ENSG00000257243
		ENSG00000199377	RNU5F-1	ENSG00000104228	TRIM35
		ENSG00000236723		ENSG00000229132	EIF4A1P10
		ENSG00000244642	RN7SL396P	ENSG00000139197	PEX5
		ENSG00000064225	ST3GAL6	ENSG00000264275	RN7SL753P
		ENSG00000111011	RSRC2	ENSG00000132164	SLC6A11
		ENSG00000244274	DBNDD2	ENSG00000215424	MCM3AP-AS1
		ENSG00000215458		ENSG00000265417
		ENSG00000106624	AEBP1	ENSG00000261544
		ENSG00000105821	DNAJC2	ENSG00000224728
		ENSG00000269900	RMRP	ENSG00000267251
		ENSG00000243725	TTC4	ENSG00000185238	PRMT3
		ENSG00000064102	ASUN	ENSG00000228817	BACH1-IT2
		ENSG00000175556	LONRF3	ENSG00000226824
		ENSG00000164778	EN2	ENSG00000125409	TEKT3
		ENSG00000234917		ENSG00000162852	CNST
		ENSG00000269813		ENSG00000058600	POLR3E
		ENSG00000209645	SNORD105	ENSG00000086712	TXLNG
		ENSG00000177455	CD19	ENSG00000120889	TNFRSF10B
		ENSG00000273245		ENSG00000077044	DGKD
		ENSG00000244701		ENSG00000249456
		ENSG00000244692	RN7SL724P	ENSG00000141378	PTRH2
		ENSG00000264994	SNORD92	ENSG00000061455	PRDM6
		ENSG00000179899	PHC1P1	ENSG00000179958	DCTPP1
		ENSG00000264019		ENSG00000222009	BTBD19
		ENSG00000116329	OPRD1	ENSG00000212493	SNORD19
		ENSG00000205041		ENSG00000168096	ANKS3
		ENSG00000151835	SACS	ENSG00000161813	LARP4
		ENSG00000255367		ENSG00000105849	TWISTNB
		ENSG00000260633		ENSG00000119812	FAM98A
		ENSG00000113083	LOX	ENSG00000261461	UBE2MP1
		ENSG00000228040		ENSG00000144120	TMEM177
		ENSG00000250420	AACSP1	ENSG00000182319
		ENSG00000099260	PALMD	ENSG00000221926	TRIM16
		ENSG00000236782		ENSG00000165060	FXN
		ENSG00000109445	ZNF330	ENSG00000198720	ANKRD13B
		ENSG00000183199	HSP90AB3P	ENSG00000216316
		ENSG00000273154		ENSG00000086189	DIMT1
		ENSG00000160188	RSPH1	ENSG00000172840	PDP2
		ENSG00000229117	RPL41	ENSG00000174306	ZHX3
		ENSG00000171408	PDE7B	ENSG00000151131	C12orf45
		ENSG00000135253	KCP	ENSG00000254791	FAR1-IT1
		ENSG00000234636	MED14-AS1	ENSG00000142634	EFHD2
		ENSG00000217334		ENSG00000261441
		ENSG00000177519	RPRM	ENSG00000056277	ZNF280C
		ENSG00000269243		ENSG00000187546	AGMO
		ENSG00000273449		ENSG00000168495	POLR3D
		ENSG00000125351	UPF3B	ENSG00000147804	SLC39A4
		ENSG00000207233	SNORA37	ENSG00000232654	FAM136BP
		ENSG00000255856		ENSG00000116353	MECR
		ENSG00000241431		ENSG00000136895	GARNL3
		ENSG00000197168	NEK5	ENSG00000204682	CASC10
		ENSG00000185482	STAC3	ENSG00000258092
		ENSG00000224167		ENSG00000183317	EPHA10
		ENSG00000261712		ENSG00000176619	LMNB2
		ENSG00000260588		ENSG00000167962	ZNF598
		ENSG00000105619	TFPT	ENSG00000162769	FLVCR1
		ENSG00000266155		ENSG00000259071
		ENSG00000213025	COX20P1	ENSG00000130489	SCO2
		ENSG00000250329	KDELC1P1	ENSG00000145332	KLHL8
		ENSG00000213740	SERBP1P1
		ENSG00000200379	RN7SKP45
		ENSG00000268392
		ENSG00000113430	IRX4
		ENSG00000004799	PDK4
		ENSG00000124383	MPHOSPH10
		ENSG00000198171	DDRGK1
		ENSG00000261635
		ENSG00000188293	IGFL1
		ENSG00000265753	RN7SL444P
		ENSG00000187699	C2orf88
		ENSG00000177025	C19orf18
		ENSG00000207181	SNORA14B
		ENSG00000164167	LSM6
		ENSG00000117013	KCNQ4
		ENSG00000184937	WT1
		ENSG00000141540	TTYH2
		ENSG00000136111	TBC1D4
		ENSG00000198000	NOL8
		ENSG00000015133	CCDC88C
		ENSG00000242125	SNHG3
		ENSG00000248483	POU5F2
		ENSG00000162975	KCNF1
		ENSG00000224895	VPS26BP1
		ENSG00000167088	SNRPD1
		ENSG00000138028	CGREF1
		ENSG00000172965	MIR4435-1HG
		ENSG00000215866
		ENSG00000183527	PSMG1
		ENSG00000213856	VDAC1P2
		ENSG00000182646	FAM156A
		ENSG00000165684	SNAPC4
		ENSG00000228192
		ENSG00000128059	PPAT
		ENSG00000130779	CLIP1
		ENSG00000224083
		ENSG00000109881	CCDC34
		ENSG00000164932	CTHRC1
		ENSG00000202058	RN7SKP80
		ENSG00000228966	HOMER2P1
		ENSG00000254762
		ENSG00000272669
		ENSG00000250186
		ENSG00000183722	LHFP
		ENSG00000140280	LYSMD2
		ENSG00000230648
		ENSG00000242082
		ENSG00000187796	CARD9
		ENSG00000170684	ZNF296
		ENSG00000228696	ARL17B
		ENSG00000248527	MTATP6P1
		ENSG00000148291	SURF2
		ENSG00000261705
		ENSG00000230383
		ENSG00000205861	C1QTNF9B-AS1
		ENSG00000188897
		ENSG00000228639
		ENSG00000270172
		ENSG00000256892	MTRNR2L7
		ENSG00000105792	C7orf63
		ENSG00000236048
		ENSG00000238324	RN7SKP198
		ENSG00000227741
		ENSG00000200312	RN7SKP255
		ENSG00000100029	PES1
		ENSG00000156017	C9orf41
		ENSG00000236809	SNX25P1
		ENSG00000172660	TAF15
		ENSG00000250615
		ENSG00000111142	METAP2
		ENSG00000198917	C9orf114
		ENSG00000108848	LUC7L3
		ENSG00000266019	MIR3609
		ENSG00000179477	ALOX12B
		ENSG00000228107
		ENSG00000198042	MAK16
		ENSG00000215527
		ENSG00000222974	RN7SKP228
		ENSG00000226180
		ENSG00000201161	RN7SKP10
		ENSG00000249896
		ENSG00000129007	CALML4
		ENSG00000166197	NOLC1
